P6220

## The non-invasive coronary flow reserve predicts exercise capacity in patients undergoing cardiac rehabilitation

P. Meimoun, M. Ghannem, J. Clerc

*University Hospital of Compiègne, Compiègne, France*

**Background:** The benefit of exercise on peripheral muscles is established but the exact role of the coronary microcirculation in exercise capacity after cardiac rehabilitation (CR) is unclear. Objective: Our aim was to test the relationship between non-invasive coronary flow reserve (CFR) and exercise capacity in patients undergoing CR after acute myocardial infarction (AMI).

**Methods:** CFR was performed by transthoracic Doppler echocardiography in the left anterior descending artery 24 h after angioplasty (CFR1) and after 20 sessions of CR program (at 4±1 months) (CFR2) in 60 consecutive patients (57±11 years, 30% women) with an anterior AMI successfully treated by primary coronary angioplasty. CFR was performed in a modified parasternal view using intravenous adenosine infusion (0.14 mg/kg/min within 2 minutes). CR program consisted of a half hour of fractioned exercise added of a half hour session of general gymnastics and body building.

To test the exercise capacity, symptom limited exercise echocardiography was performed just after the CFR2, in a semi-supine position, starting at 25 watts, with 20–25 watts increments of workload every two minutes.

**Results:** CFR was measured successfully in all patients, and CFR2 was significantly higher than CFR1 ( $2.9 \pm 0.65$  vs  $1.9 \pm 0.4$ ,  $p < 0.001$ ). Though CFR1 was correlated to left ventricular systolic function and its improvement at follow-up (all,  $p < 0.01$ ), CFR2 was independently related to exercise capacity (mean workload  $100 \pm 30$  watts, percent maximal heart rate  $83 \pm 12\%$ , no ischemia, no new wall motion abnormalities in all tests) after adjusting for age, sex, and body mass index ( $r = 0.6$ ,  $p < 0.01$ ).

**Conclusion:** CFR predicts exercise capacity in patients undergoing a CR program after AMI. The improvement of CFR contributes to cardiac performance.
